# Supplementary material
Source: PubMed Central journal article supplement (PMC4892703)
Supplement: supp_ntu153_NTR_PK_ECIG_Supplementary_Data_Revision_1.pdf [file supp_ntu153_NTR_PK_ECIG_Supplementary_Data_Revision_1.pdf]

**Supplementary File.** Nicotine delivery profiles for individual participants.

**Baseline**

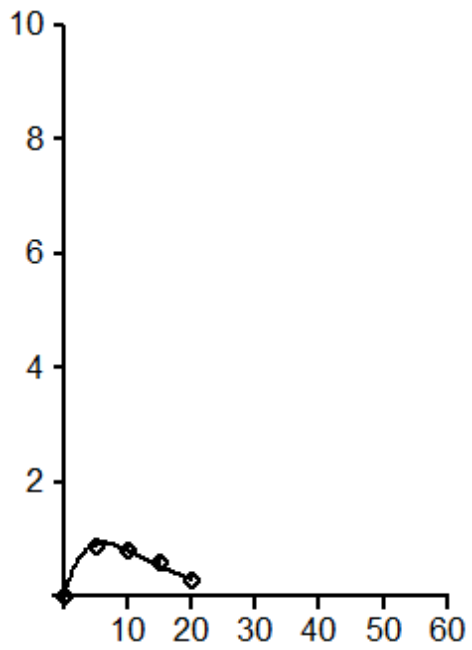

**Follow-up**

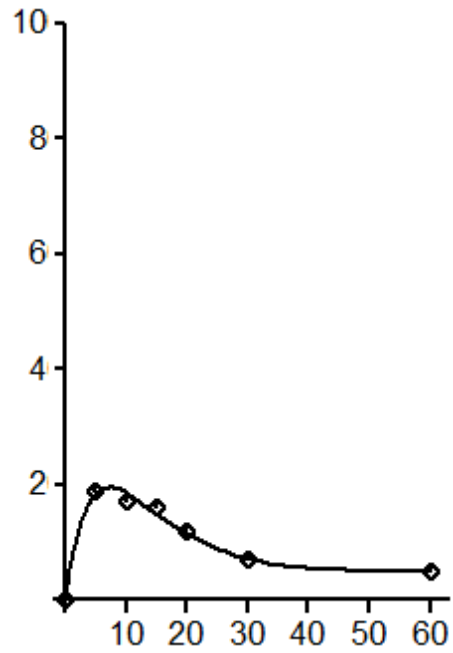

Participant 1, never tried EC

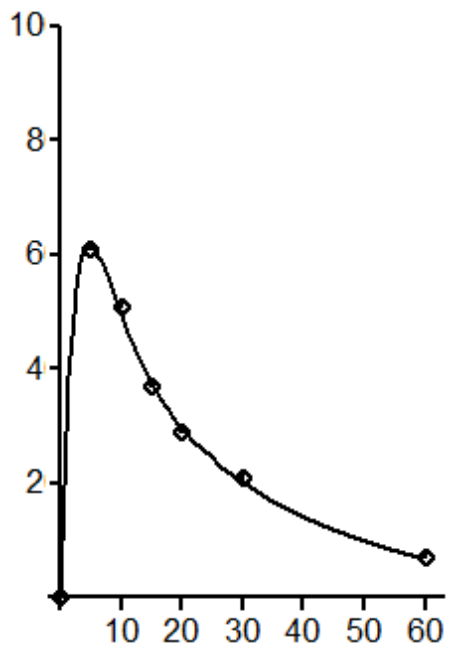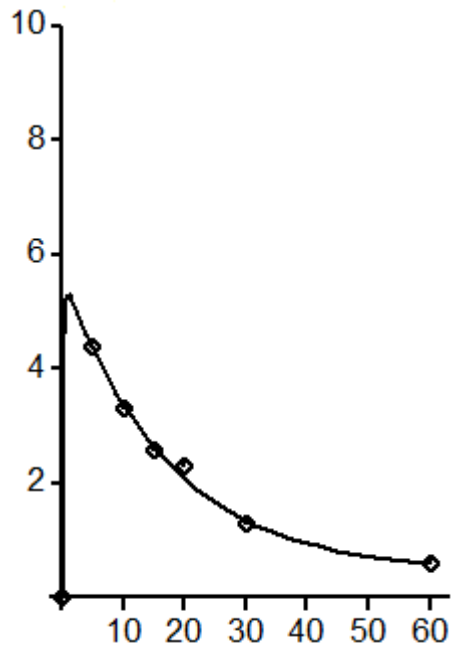

Participant 2, tried EC once

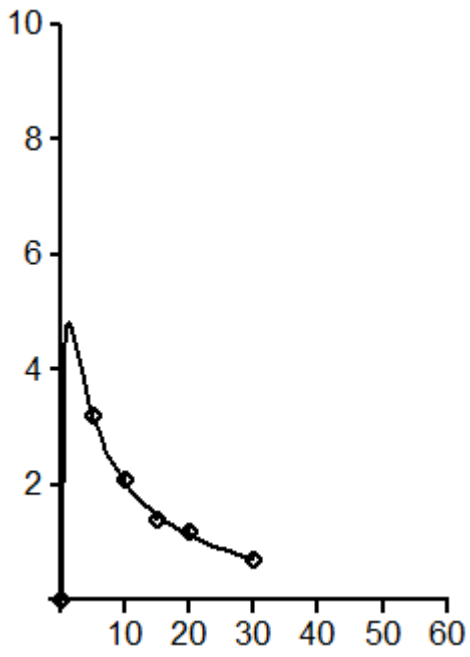

Participant 3, never tried EC

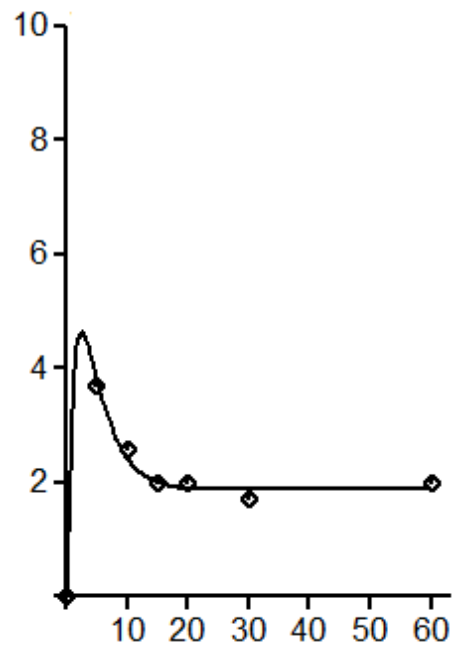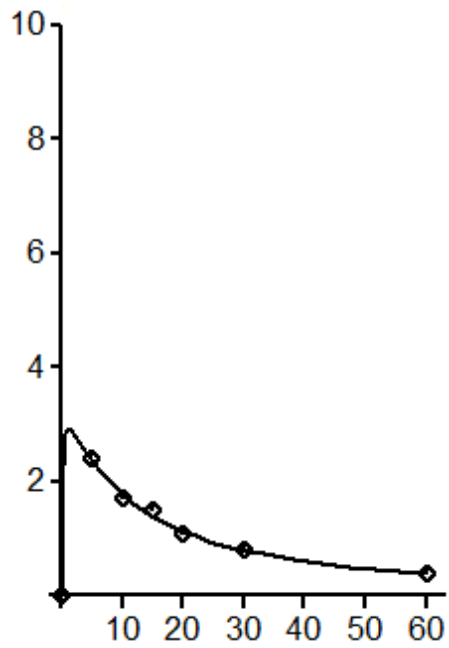

Participant 4, never tried EC

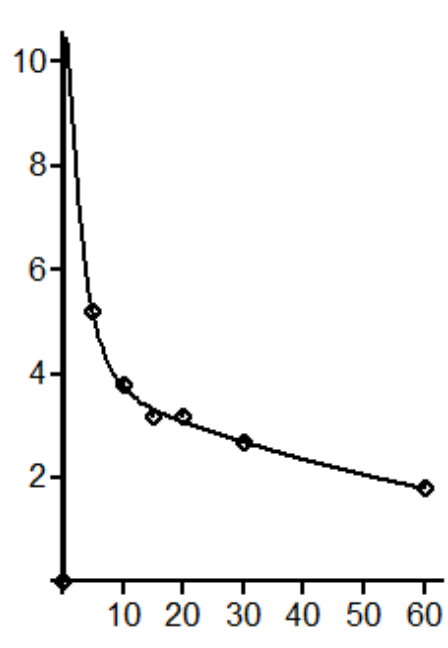

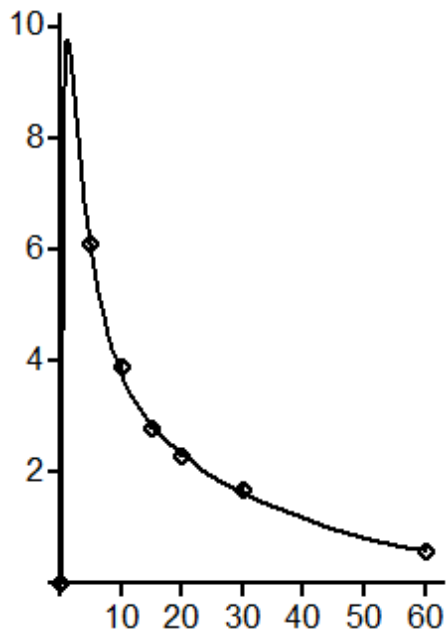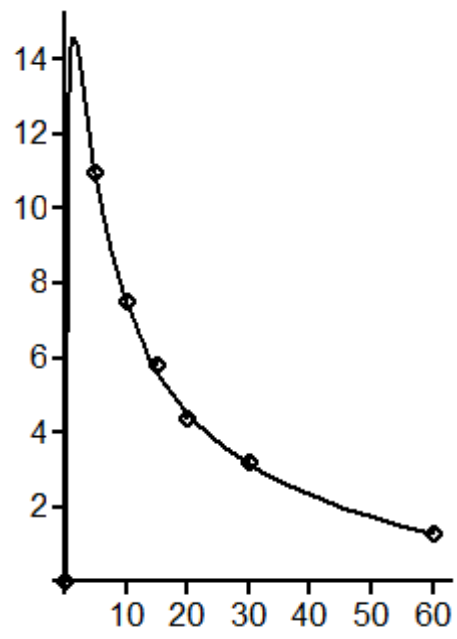

Participant 5, used EC several times over a few days

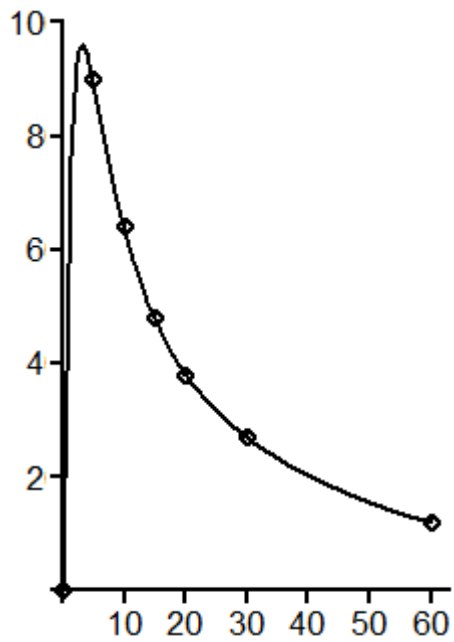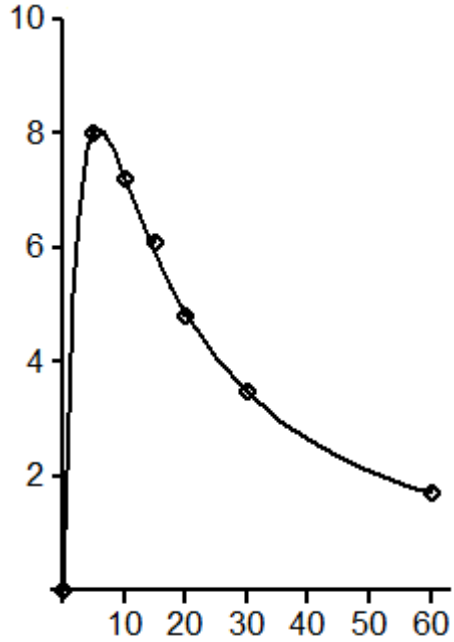

Participant 6, tried EC 3 times
